# Supplementary material
Source: publisher figshare collection journal article supplement (https://acs.figshare.com/ndownloader/files/4529638)
Supplement: Supplementary file 1 [file 4529638]

# Etching-Resistant Silver Nanoprisms by Epitaxial Deposition of a Protecting Layer of Gold at the Edges

Damian Aherne,\* Denise E. Charles, Margaret E. Brennan-Fournet, John M. Kelly and Yurii K. Gun'ko\*

School of Chemistry, Trinity College Dublin, Dublin 2, Ireland, and School of Physics, National University of Ireland, Galway, Ireland.

damian.aherne@gmail.com, igounko@tcd.ie

| Sample | Au:Ag   | $\Delta\lambda_{\text{max,LSPR}}$ (nm) |         |       |        |        |
|--------|---------|----------------------------------------|---------|-------|--------|--------|
|        |         | No NaCl                                | 10 mins | 1 day | 2 days | 5 days |
| A      | 0:1     | 0                                      | -146    | -146  | -146   | -146   |
| B      | 0.01:1  | 0                                      | -30     | -86   | -98    | -110   |
| C      | 0.033:1 | 0                                      | -25     | -26   | -26    | -29    |
| D      | 0.083:1 | 0                                      | -2      | -2    | -2     | -3     |
| E      | 0.167:1 | 0                                      | +1      | +2    | +2     | +1     |
| F      | 0.333:1 | 0                                      | +9      | +10   | +10    | +7     |

Table S1. Shifts in position of main (in-plane dipole) LSPR of each of the samples above at various points in time after exposure to 10 mM NaCl.

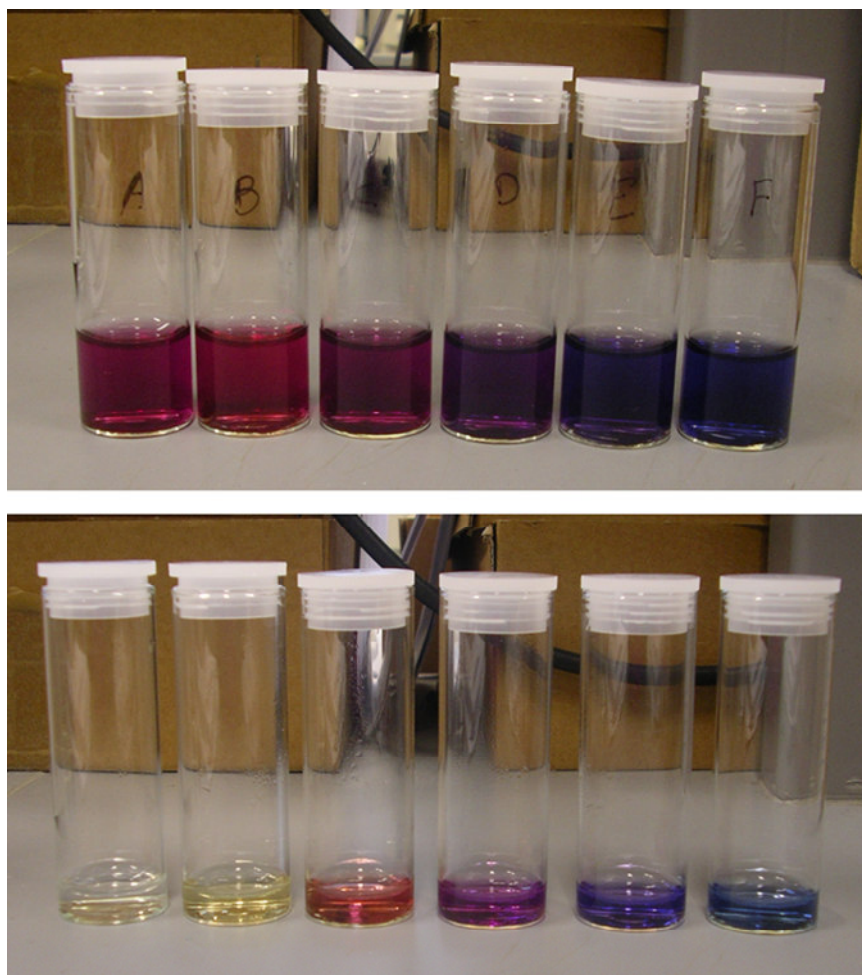

Figure S1. *Top:* Photograph of vials containing Samples A to F the spectra for which are shown in the top panel of Figure 1 in the main text. *Bottom:* Photograph of vials containing aliquots of Samples A to F that have been at 10 mM NaCl for 5 days. The spectra for these are shown in the bottom panel of Figure 1 of the main text.

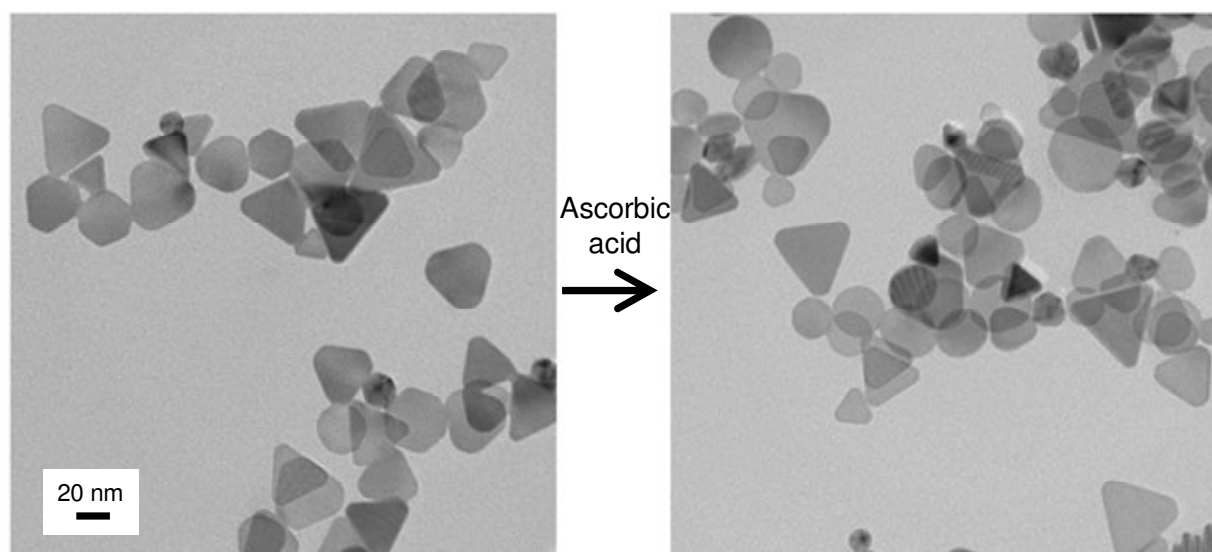

Figure S2. TEM images illustrating that ascorbic acid results in rounding of the tips of many silver nanoprisms in the sample, resulting in the formation of many discs.
